# Supplementary material for: Investigation of human adipose stem cell-derived nanoparticles as a biomimetic carrier for intracellular drug delivery
Source: Royal Society of Chemistry journal article supplement (doi:10.1039/d0nr06571d), 2020-01-01
Supplement: d0nr06571d1.pdf [file d0nr06571d1.pdf]

## **Supplementary Information**

### **Investigation of human adipose stem cell-derived nanoparticles as a biomimetic carrier for intracellular drug delivery**

Aparna R. Chakravarti<sup>a</sup>, Settimio Pacelli<sup>b</sup>, Arghya Paul<sup>c\*</sup>

<sup>a</sup> *Bioengineering Graduate Program, School of Engineering, University of Kansas, Lawrence, KS, 66045, USA*

<sup>b</sup> *Department of Biomedical Engineering, The University of Texas at San Antonio, San Antonio, TX, 78249, USA*

<sup>c</sup> *Department of Chemical and Biochemical Engineering, Department of Chemistry, The University of Western Ontario, London, ON N6A 5B9, Canada*

\*Corresponding author:

Dr. Arghya Paul

Email: [arghya.paul@uwo.ca](mailto:arghya.paul@uwo.ca)

| Sample | $\eta$ dispersed | $\eta$ continuous | Measured T% (beginning) | Measured T% (end) | Particle size (beginning) | Particle size (end) |
|--------|------------------|-------------------|-------------------------|-------------------|---------------------------|---------------------|
| CDNs   | 1.377            | 1.334             | 90.75                   | 90.72             | 88.4                      | 90                  |

**Figure S1. Particle size analysis of the cell-derived nanoparticles (CDNs)** A) Variation in Transmitted light signals (T%) as a measure of particle size (nm) for CDNs. Where,  $\eta$  dispersed,  $\eta$  continuous are the refractive indices of the two phases. The amount of scattered light is directly dependent upon particle size and concentration in accordance with Mie scattering theory.

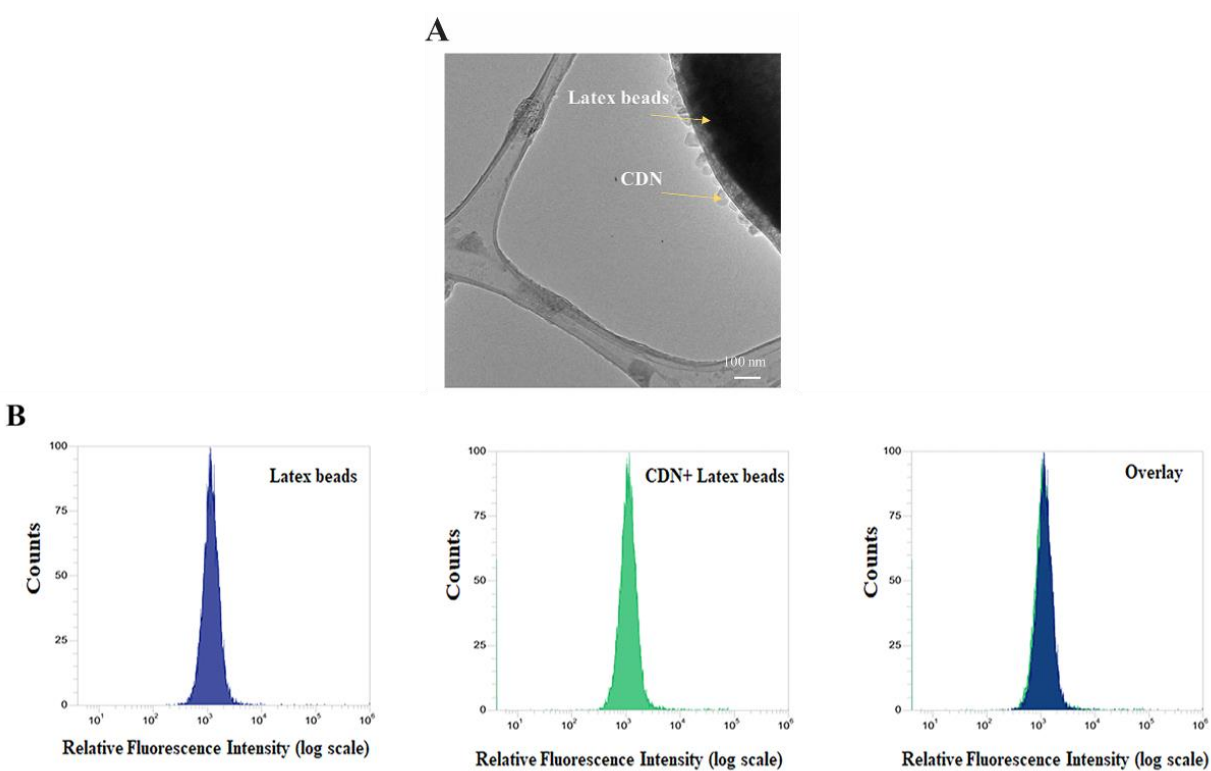

**Figure S2. CDN-Latex bead conjugation** A) TEM analysis of the attachment of CDNs onto the surface of aldehyde/sulfate latex beads. (Scale bar = 100 nm) B) Bead-assisted flow cytometry analysis to investigate the successful conjugation of CDNs and latex beads.

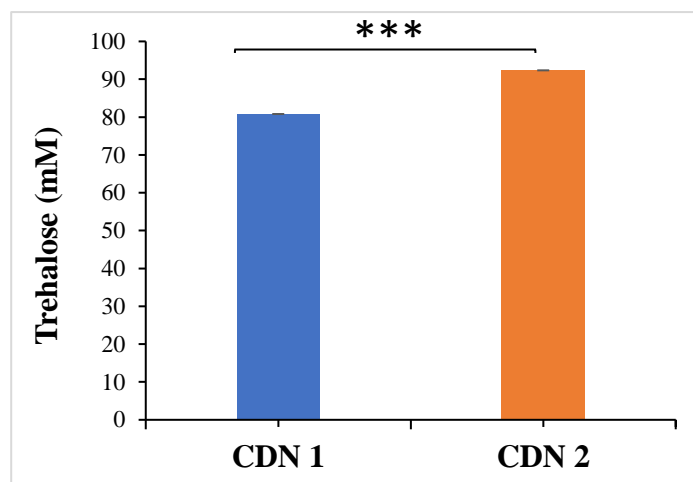

**Fig S3. Loading efficiency of a model cell-impermeable molecule (Trehalose) into CDNs via extrusion techniques** A) Enzymatic quantification of trehalose loading efficiency into CDNs via extrusion loading techniques. Two different samples of nanocarriers- CDN 1 and CDN 2 were tested to account for any batch-related variability and showcase the reproducibility of the encapsulation process. (n=3)
